# Supplementary material for: Deciphering Symbiotic Interactions of “Candidatus Aenigmarchaeota” with Inferred Horizontal Gene Transfers and Co-occurrence Networks
Source: PubMed Central journal article supplement (PMC8407114; doi:10.1128/msystems.00606-21), 2021-07-27

a

### KOs

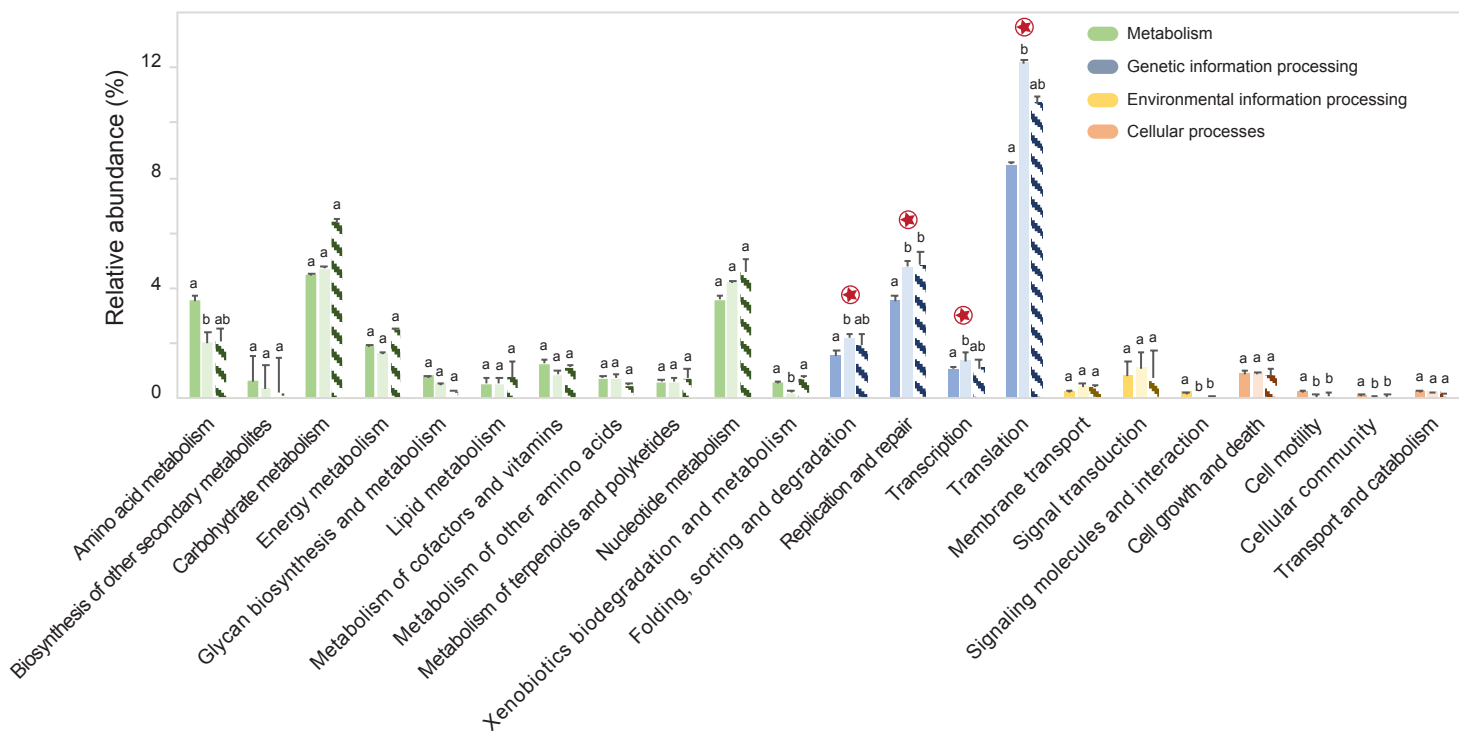

b

### arCOGs

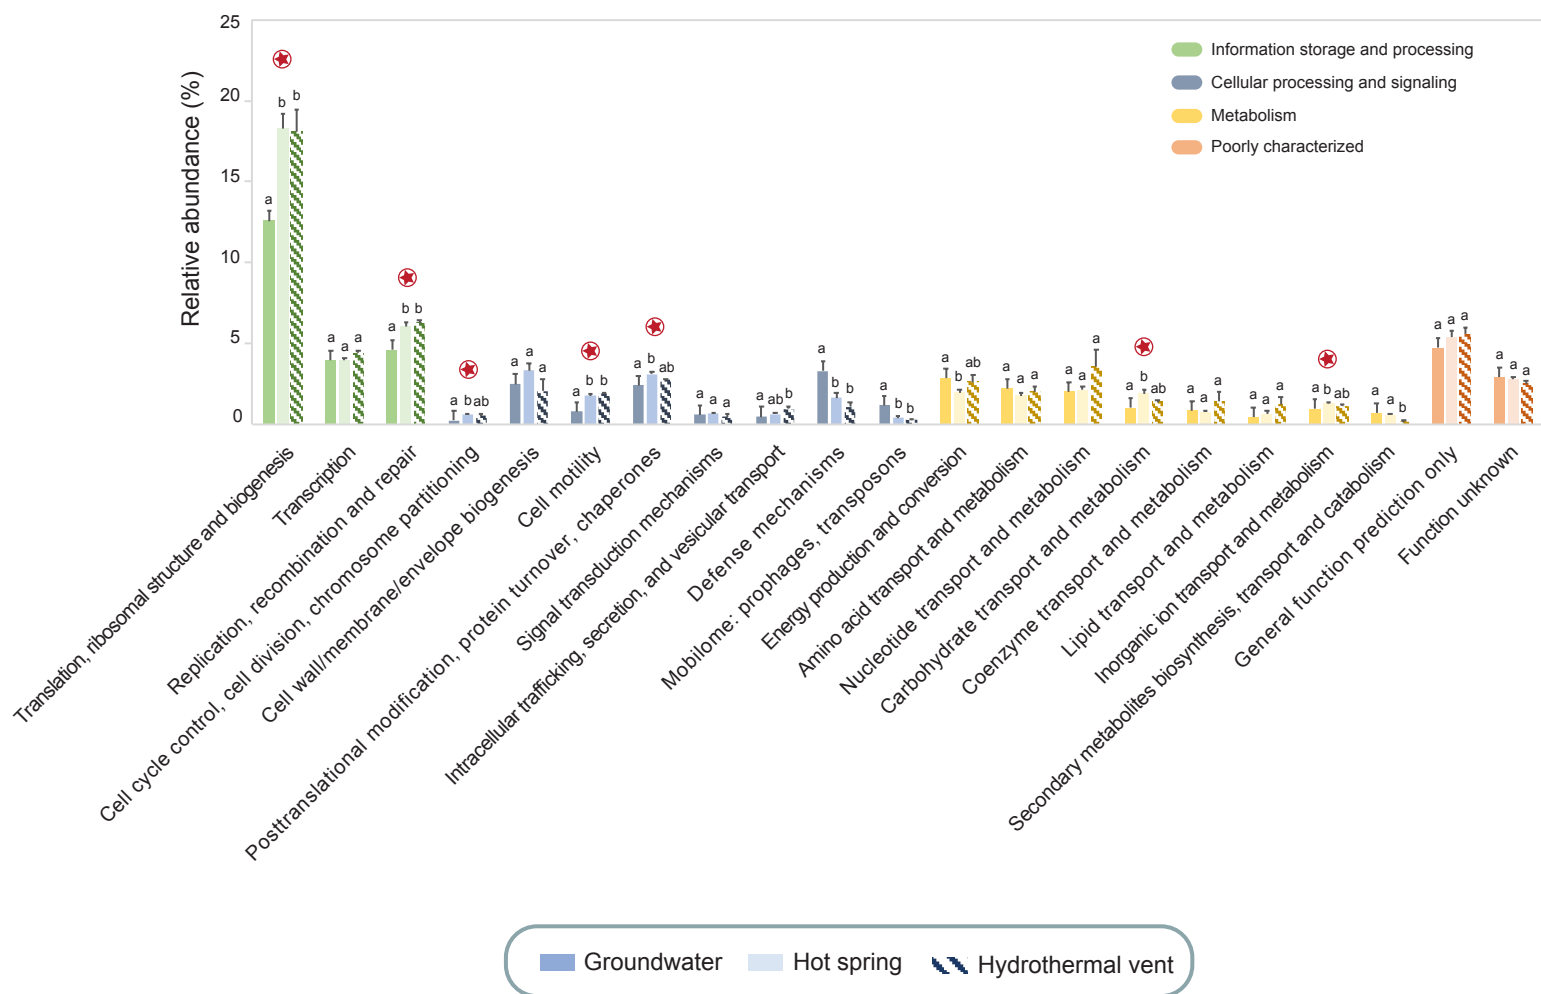

Supplement: msystems.00606-21-sf003.pdf [file msystems.00606-21-sf003.pdf]
