# Supplementary material for: Deciphering Symbiotic Interactions of “Candidatus Aenigmarchaeota” with Inferred Horizontal Gene Transfers and Co-occurrence Networks
Source: PubMed Central journal article supplement (PMC8407114; doi:10.1128/msystems.00606-21), 2021-07-27

### a. CRISPR-cas system

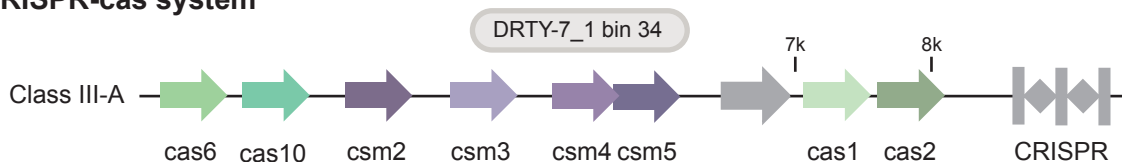

### b. Restriction modification system

| MAGs                                        | Type I | Type II | Type III |
|---------------------------------------------|--------|---------|----------|
| DRTY-6_1 bin 65                             |        | ★       | ★        |
| DRTY-7_1 bin 34                             |        | ★       | ★        |
| GMQ_1 bin 18-1                              |        |         | ★        |
| QQ_2 bin 128                                |        | ★       | ★        |
| DRTY-6_2 bin 201                            | ★      | ★       |          |
| DRTY-6_2 bin 202                            | ★      | ★       | ★        |
| Aenigmarchaeum subterraneum SCGC AAA011-O16 | ★      |         |          |
| Aenigmarchaeota AR5                         |        | ★       |          |
| Aenigmarchaeota CG_4_10_14_0_8              |        |         | ★        |
| Aenigmarchaeota CG_4_10_14_3                |        |         | ★        |
| Aenigmarchaeota CG_4_8_14_3                 |        |         | ★        |
| Aenigmarchaeota CG_4_9_14_3_150             |        |         | ★        |
| Aenigmarchaeota CG01_8_20_14_3_00           |        |         | ★        |
| Aenigmarchaeota CG15_8_21_14_020            | ★      |         | ★        |
| Aenigmarchaeota archaeon CG1_02_38_14       |        |         | ★        |
| Aenigmarchaeota archaeon ex4484_56          |        |         | ★        |
| Aenigmarchaeota archaeon ex4484_224         |        |         | ★        |
| Aenigmarchaeota archaeon ex4484_14          |        |         | ★        |

### c. Other potential cell defense systems

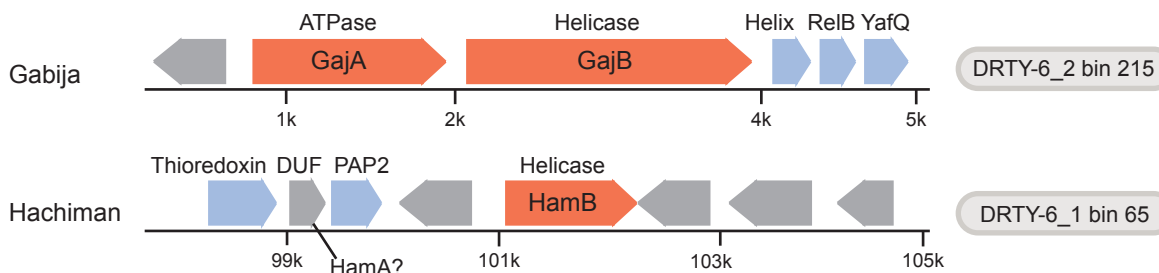

Supplement: msystems.00606-21-sf004.pdf [file msystems.00606-21-sf004.pdf]
